# Supplementary material for: Equity in health insurance schemes enrollment in low and middle-income countries: A systematic review and meta-analysis
Source: Springer Nature journal article supplement (doi:10.1186/s12939-021-01608-x), 2022-02-12

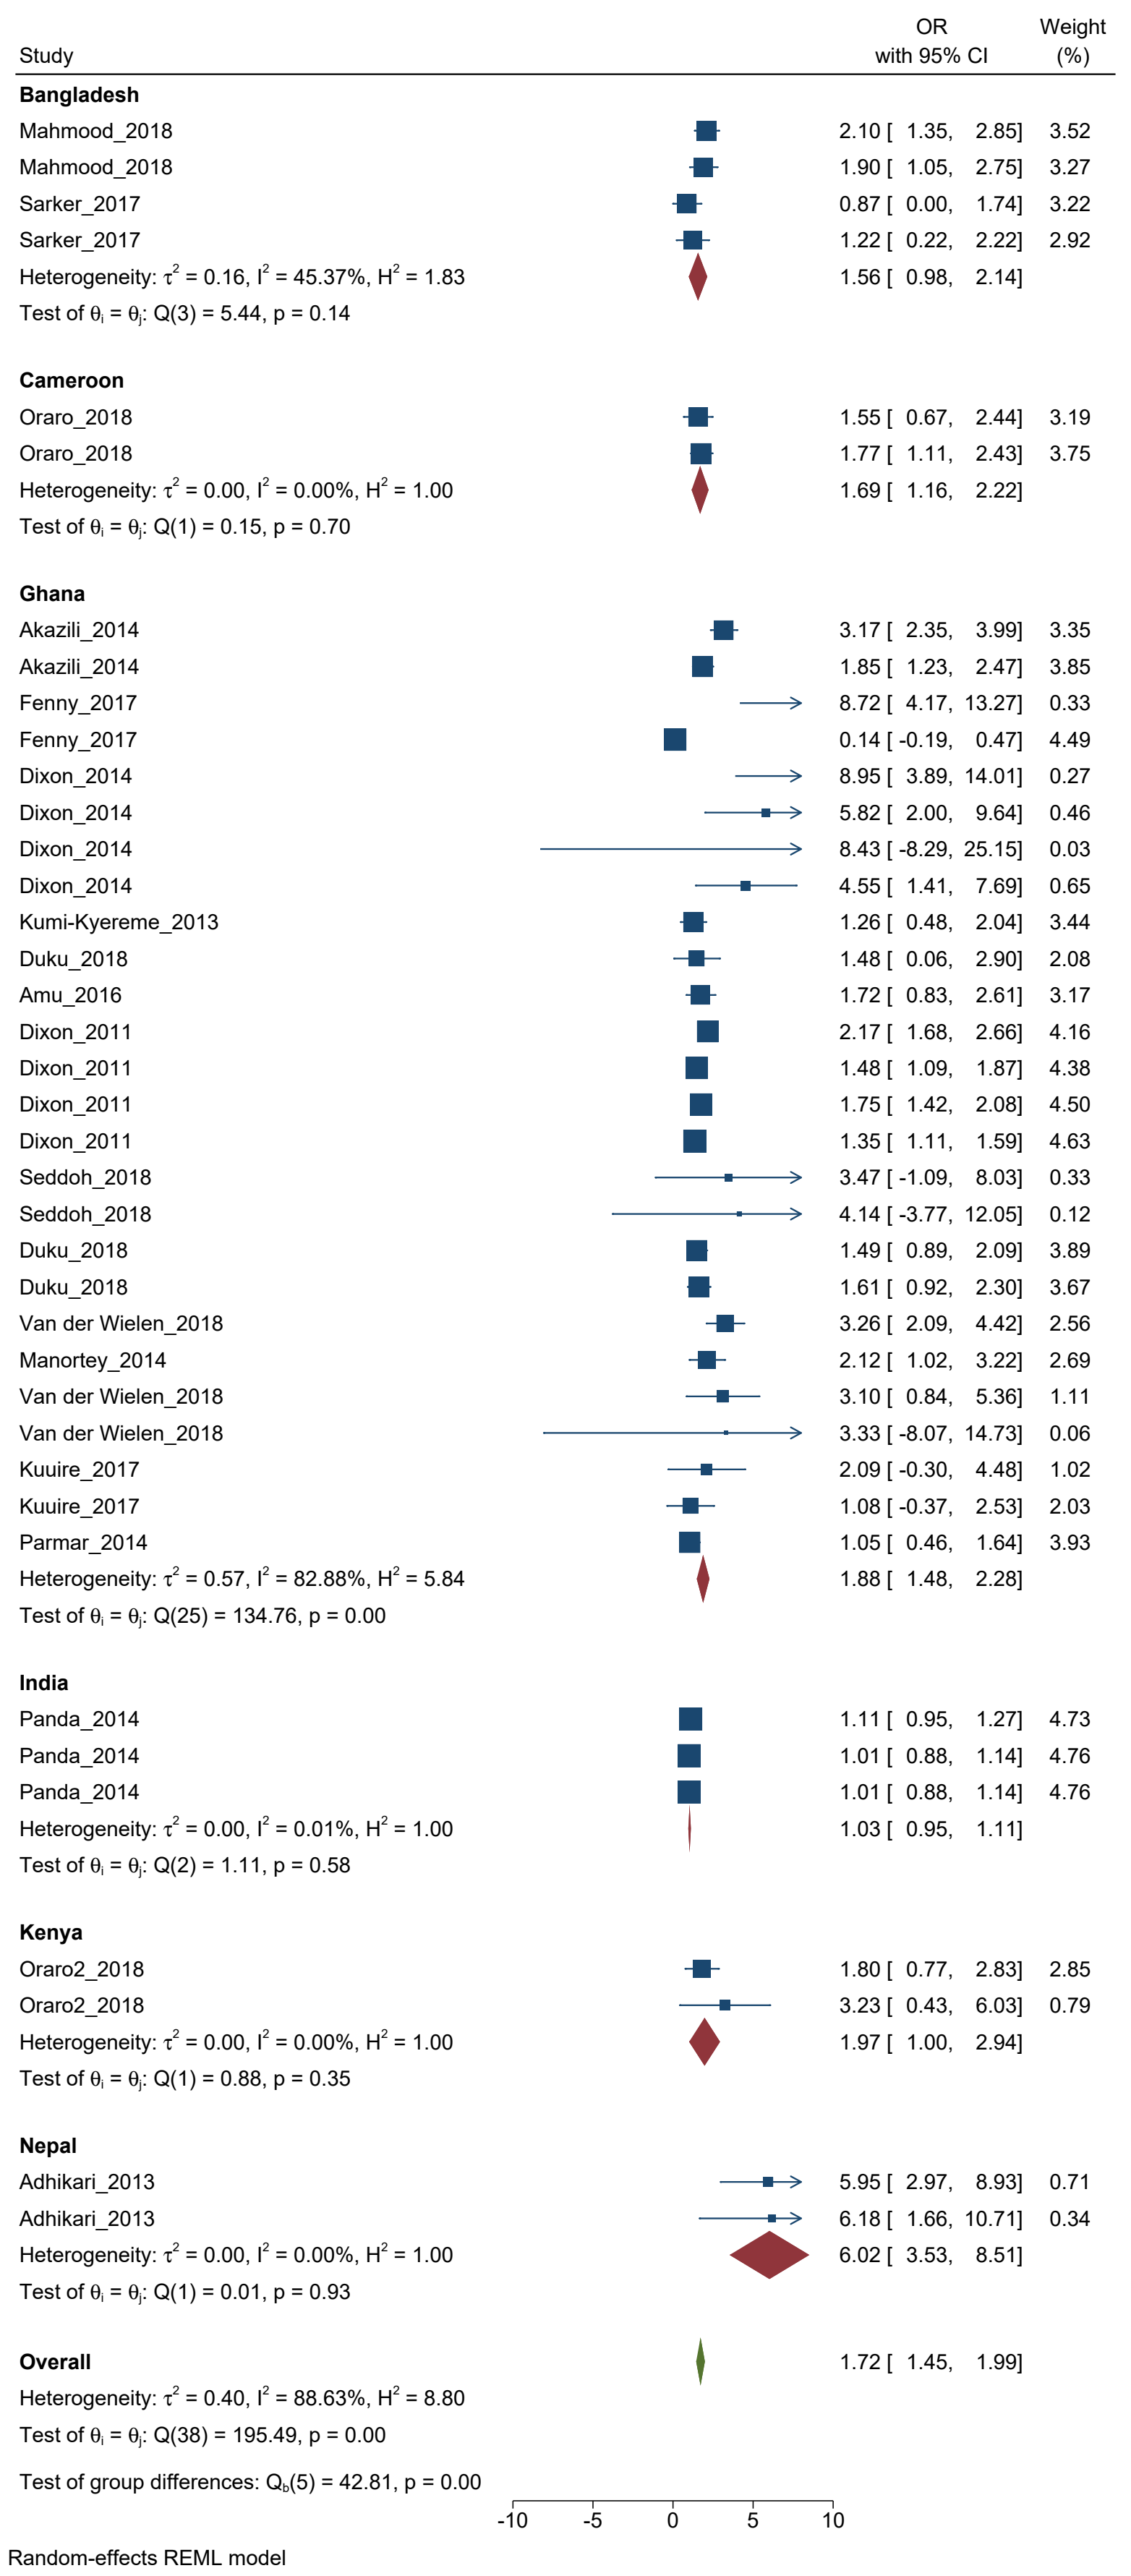

Supplement: MOESM4 [file 20127990]
